# Supplementary material for: Gold nanorod-enhanced two-photon excitation fluorescence of conjugated oligomers for two-photon imaging guided photodynamic therapy
Source: Royal Society of Chemistry journal article supplement (doi:10.1039/c9tc04429a), 2019-01-01
Supplement: c9tc04429a1.pdf [file c9tc04429a1.pdf]

Supporting Information

**Gold Nanorods Enhanced Two-photon Excitation Fluorescence  
of Conjugated Oligomers for Two-photon Imaging Guided  
Photodynamic Therapy**

*Tingting Zhao<sup>a\*</sup>, Lin Li<sup>b</sup>, Shuang Li<sup>b</sup>, Xiao-Fang Jiang<sup>b</sup>, Cui Feng Jiang<sup>b</sup>, Na Zhou<sup>b</sup>,  
Nengyue Gao<sup>b</sup>, Qing-Hua Xu<sup>b\*</sup>*

a School of Basic Medical Sciences, Anhui Medical University, Hefei, Anhui, China  
230032

b Department of Chemistry, Faculty of Science, National University of Singapore, 3  
Science Drive 3, Singapore 117543

\*Correspondence author. E-mail: [ttzhao@ahmu.edu.cn](mailto:ttzhao@ahmu.edu.cn), [chmxqh@nus.edu.sg](mailto:chmxqh@nus.edu.sg)

## Synthesis of OFBV

**Scheme S1** displays the synthesis routes of the water conjugated polymer used in our experiment. Oligo-[9,9-bis(6''-bromoethyl)fluorene-2,7-ylenevinylene-co-alt-1,4-(2,5-dibromophenylene)] (OFV-Br) was synthesized by using a previously reported method via the Wittig-Horner condensation reaction between dialdehyde and 1,4-bis(diethylphosphinatomethyl) phenylene in dry THF by slowly adding 1 equiv of t-BuOK.<sup>1,2</sup> Water soluble cationic conjugated oligomer OFBV was obtained by quaternization of the neutral polymers OFV-Br in excess of trimethylammonium in methanol/chloroform at room temperature for 48 h. The molecular weights of the neutral polymers were determined by gel permeation chromatography (GPC) using THF as the eluent. The number-averaged molecular weights (Mn) for OFV-Br was determined to be 4200 with PDI (Mw/Mn) = 1.26. The numbers of repeat unit for OFV-Br is 7.

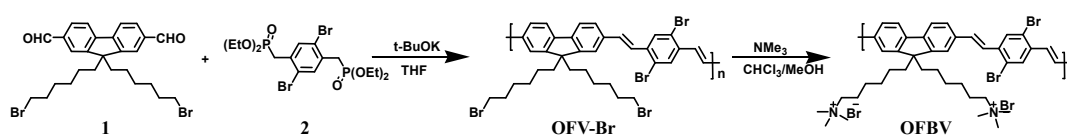

**Scheme S1** Synthesis procedures of the water soluble conjugated oligomer OFBV.

### Poly(9,9-bis(6''-(bromoethyl)fluorene-2,7-ylenevinylene-co-alt-1,4-(2,5-dibromophenylene))(OFV-Br).

2,7-Diformyl-9,9-di(6'-bromoethyl) fluorene (0.5 mmol) and 1,4-bis(diethylphosphinatomethyl)-2,5-dibromobenzene (0.5 mmol) in dry THF (20 mL) was stirred at room temperature. After potassium tert-butoxide (2 mmol) was slowly added, the solution was stirred for 4h at room temperature before being quenched with

dilute aqueous HCl (20 mL). The solution was then poured into methanol (250 mL) under stirring. The precipitate was collected by filtration. The crude polymer was dissolved in THF, precipitated in methanol three times, and then dried under vacuum to give a yellow solid product. <sup>1</sup>H NMR (300MHz, CDCl<sub>3</sub>, δ): 7.98-7.31 (m, 12H), 3.27 (br, 4H), 2.05 (br, 4H), 1.65-1.58 (br, 4H), 1.22-1.10 (br, 8H), 0.61 (br, 4H); GPC: Mn=4200, Mw=5300, PDI=1.26.

**Poly(9,9-bis(6''-(N,N,N-trimethyl-ammonium)hexyl)fluorene-2,7-ylenevinylene-co-alt-1,4-(2,5-dibromophenylene))(OFBV).**

OFV-Br were dissolved in THF (20 mL). Trimethylamine (5 mL, 30%) in ethanol was then added. The mixture was stirred for 48 h at room temperature. The solid products PFBV was obtained after evaporation of the solvent at vacuum. <sup>1</sup>H NMR (300MHz, DMSO-*d*<sub>6</sub>, δ): 8.24-7.44 (m, 12H), 3,18 (br, 18H), 2.97 (br, 4H), 2.01 (br, 4H), 1.47 (br, 4H), 1.10-1.06 (br, 8H), 0.53 (br, 4H).

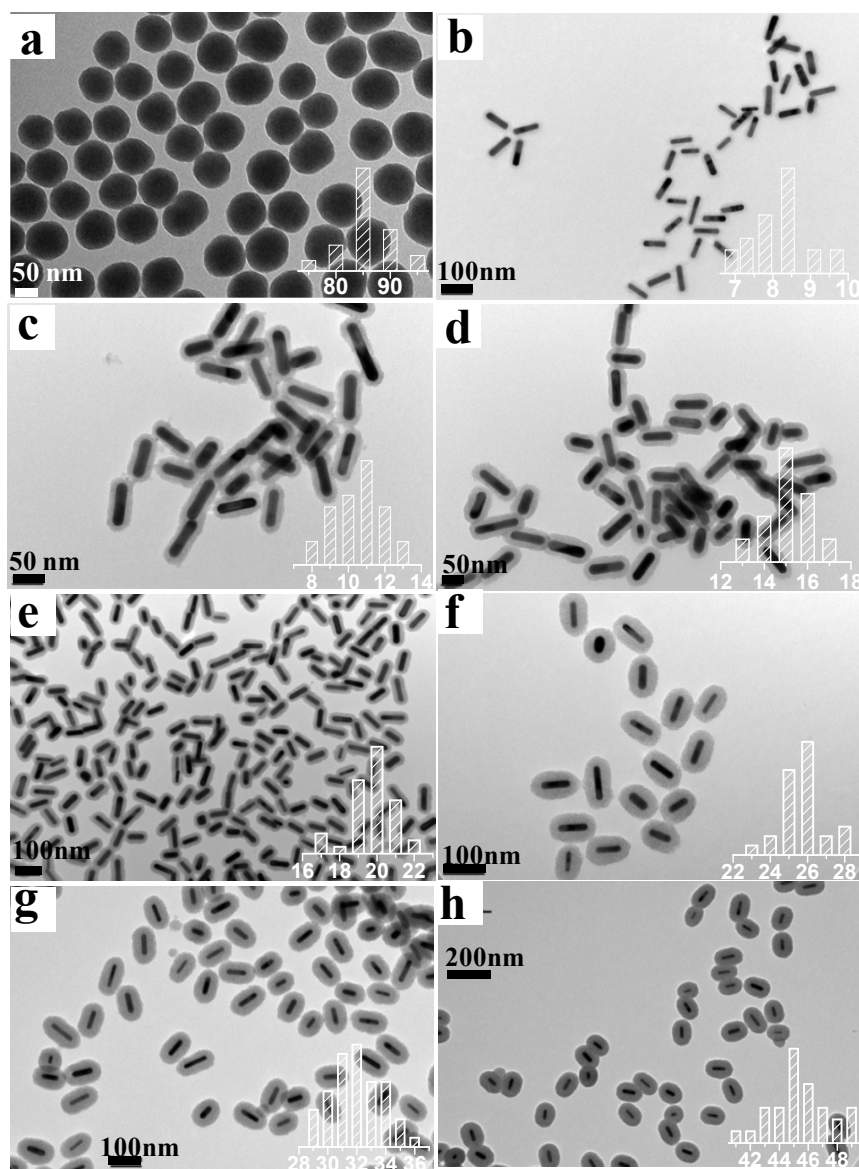

**Figure S1**(a) TEM images of SiO<sub>2</sub> ( $85 \pm 3$  nm), and Au NR/SiO<sub>2</sub> with different silica shell thickness:(b)  $8.5 \pm 0.7$  nm, (c)  $11 \pm 1.4$  nm, (d) $15 \pm 1.2$  nm, (e)  $20 \pm 1.2$  nm, (f) 26w nm, (g)  $32 \pm 1.8$  nm and (h)  $45 \pm 1.5$  nm (Insets are particle size distribution histograms).

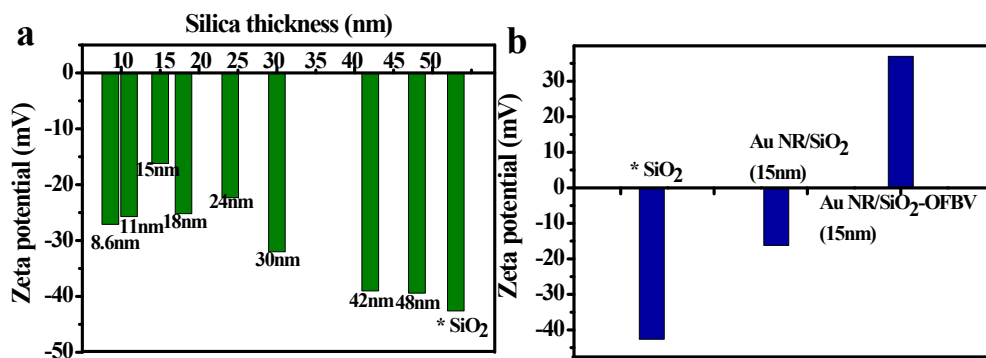

**Figure S2** Zeta potentials of AuNR/SiO<sub>2</sub> with different silica thickness (a) and AuNR/SiO<sub>2</sub>(15 nm) before and after OFBV adsorption (b).

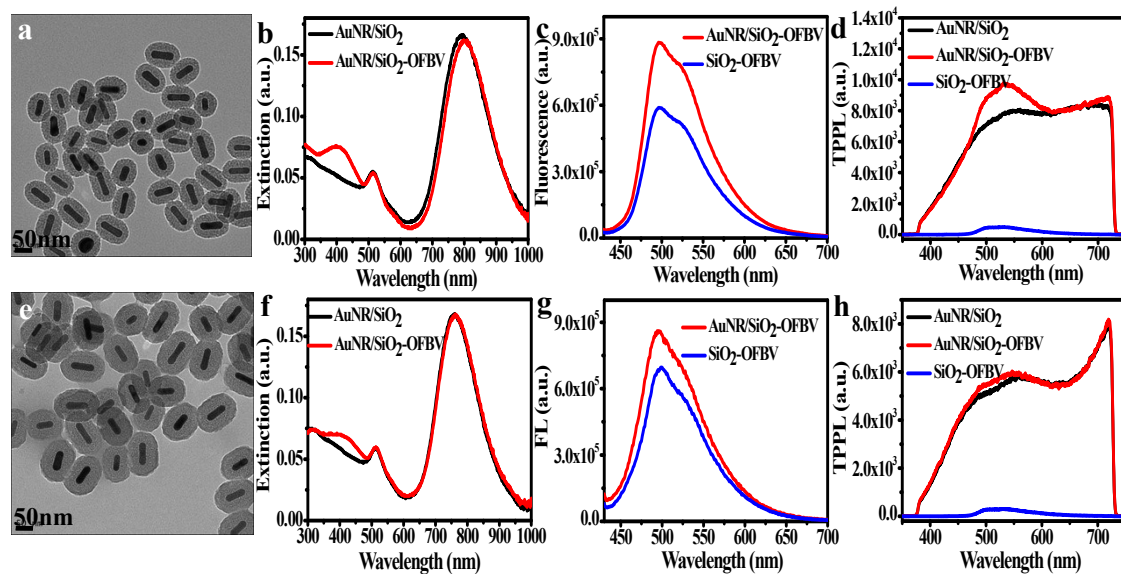

**Figure S3** TEM (a, e), extinction spectra (b, f), one- (c, g) and two-photon (d, h) fluorescence spectra of Au NR/SiO<sub>2</sub>(26nm)-OFBV and Au NR/SiO<sub>2</sub>(45nm)-OFBV in comparison with Au NR/SiO<sub>2</sub> and SiO<sub>2</sub>-OFBV.

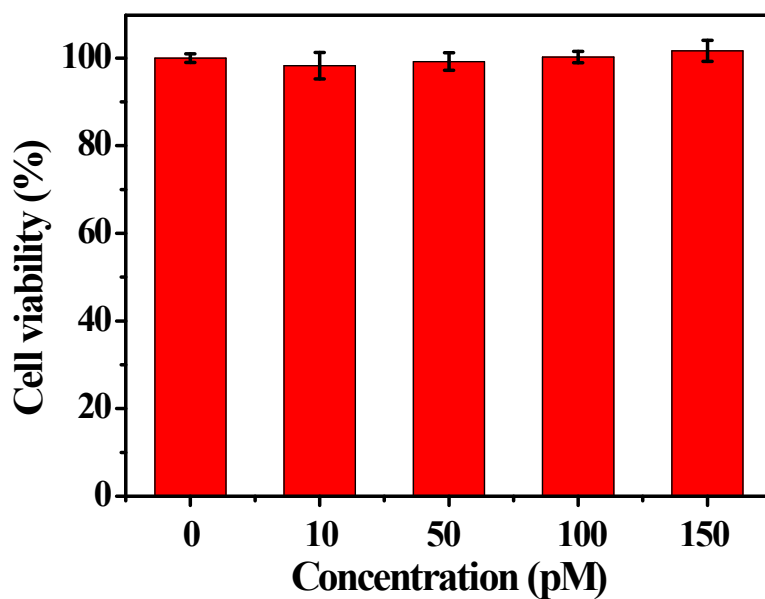

**Figure S4** Metabolic viability of HepG2 cells after incubation with AuNR/SiO<sub>2</sub>(15nm)-OFBV of different concentrations (in concentration of AuNRs) for 24 h.

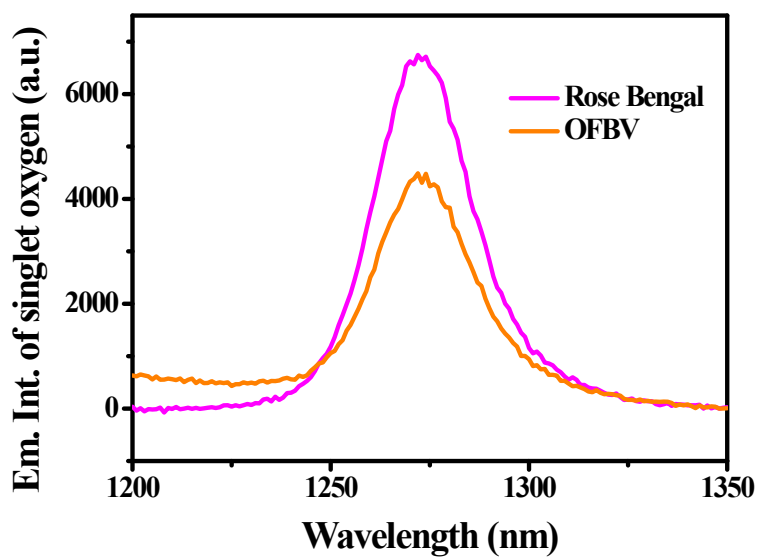

**Figure S5** Phosphorescence spectra of singlet oxygen generated by OFBV in CD<sub>3</sub>OD under one-photon excitation. Rose Bengal in D<sub>2</sub>O was used as the standard.

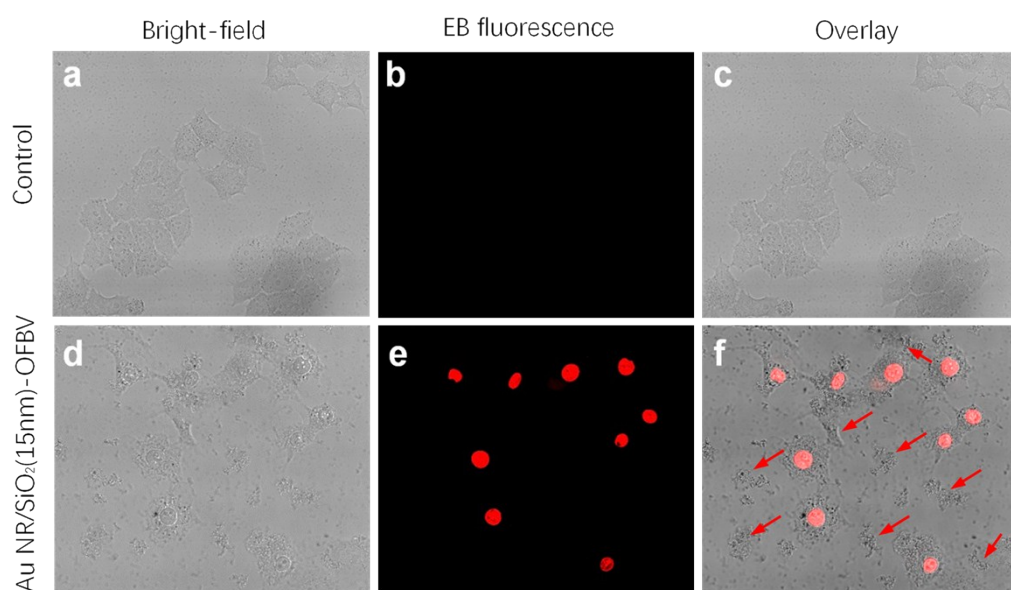

**Figure S6** (a, d) Transmission, (b, e) EB fluorescence and (c, f) Overlay images of HepG2 cells with and without AuNR/SiO<sub>2</sub>(15nm)-OFBV after irradiations by a 808 nm femtosecond laser for 10 min with power density of 3 W cm<sup>-2</sup>. Control (a, b, c) and AuNR/SiO<sub>2</sub>(15nm)-OFBV (d, e, f).

**Table S1** The structure, enhancement factor and single exponential analysis of fluorescence lifetime of SiO<sub>2</sub>-OFBV and AuNR/SiO<sub>2</sub>-OFBV with different silica shell thickness in aqueous solution.

| Samples                            | Silica shell thickness (nm) | One-photon enhancement factor | Two-photon enhancement factor | Emission lifetime (ps) |
|------------------------------------|-----------------------------|-------------------------------|-------------------------------|------------------------|
| AuNR/SiO <sub>2</sub> (8.5nm)-OFBV | 8.5                         | 0.21                          | 3.7                           | 240                    |
| AuNR/SiO <sub>2</sub> (15nm)-OFBV  | 15                          | 0.6                           | 14.2                          | 248                    |
| Au NR/SiO <sub>2</sub> (26nm)-OFBV | 26                          | 1.4                           | 3.8                           | 270                    |
| AuNR/SiO <sub>2</sub> (32nm)-OFBV  | 32                          | 1.2                           | 1.6                           | 292                    |
| AuNR/SiO <sub>2</sub> (45nm)-OFBV  | 45                          | 1.15                          | 1.1                           | 322                    |
| SiO <sub>2</sub> -OFBV             | -                           | 1                             | 1                             | 323                    |

## Reference:

- (1) Mangalum, A.; Gilliard, R. J.; Hanley, J. M.; Parker, A. M.; Smith, R. C. *Org. Biomol. Chem.* **2010**, *8*, 5620.
- (2) He, F.; Ren, X. S.; Shen, X. Q.; Xu, Q. H. *Macromolecules* **2011**, *44*, 5373.
